# Supplementary material for: Domino synthesis of protochromic “ON–OFF–ON” luminescent 2-styryl quinolines
Source: Royal Society of Chemistry journal article supplement (doi:10.1039/c3ob27270b), 2013-01-01
Supplement: c3ob27270b.pdf [file c3ob27270b.pdf]

## Supporting Information

### Domino synthesis of protochromic “ON-OFF-ON” luminescent 2-styryl quinolines

Rahime Cinar, Jan Nordmann, Elena Dirksen, Thomas J. J. Müller\*

Institut für Organische Chemie und Makromolekulare Chemie, Heinrich-Heine-Universität

Düsseldorf Universitätsstraße 1, 40225 Düsseldorf, Germany

Email: ThomasJJ.Mueller@uni-duesseldorf.de

### Table of contents

|                                                                                              |    |
|----------------------------------------------------------------------------------------------|----|
| 1 <sup>1</sup> H and <sup>13</sup> C NMR spectra of 2-styrylquinoline <b>3a-3c</b> .....     | 2  |
| 1.1 ( <i>E</i> )-2-(4-Dimethylamino)styryl)-quinoline ( <b>3a</b> ) .....                    | 2  |
| 1.2 ( <i>E</i> )-2-(4-Dimethylamino)styryl)-quinoline-6-trifluoromethane ( <b>3b</b> ) ..... | 4  |
| 1.3 ( <i>E</i> )-2-(4-Dimethylamino)styryl)-quinoline-6-carbonitrile ( <b>3c</b> ) .....     | 6  |
| 2 Selected UV/Vis and emission spectra of 2-styryl quinoline <b>3c</b> .....                 | 8  |
| 3 Determination of the p <i>K</i> <sub>a</sub> Value of <b>3c</b> .....                      | 13 |
| 4 Computational details .....                                                                | 15 |

# 1 <sup>1</sup>H and <sup>13</sup>C NMR spectra of 2-styrylquinoline 3a-3c

## 1.1 (*E*)-2-(4-Dimethylamino)styryl)-quinoline (3a)

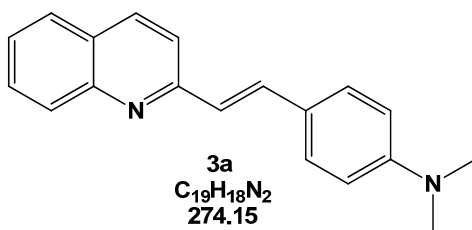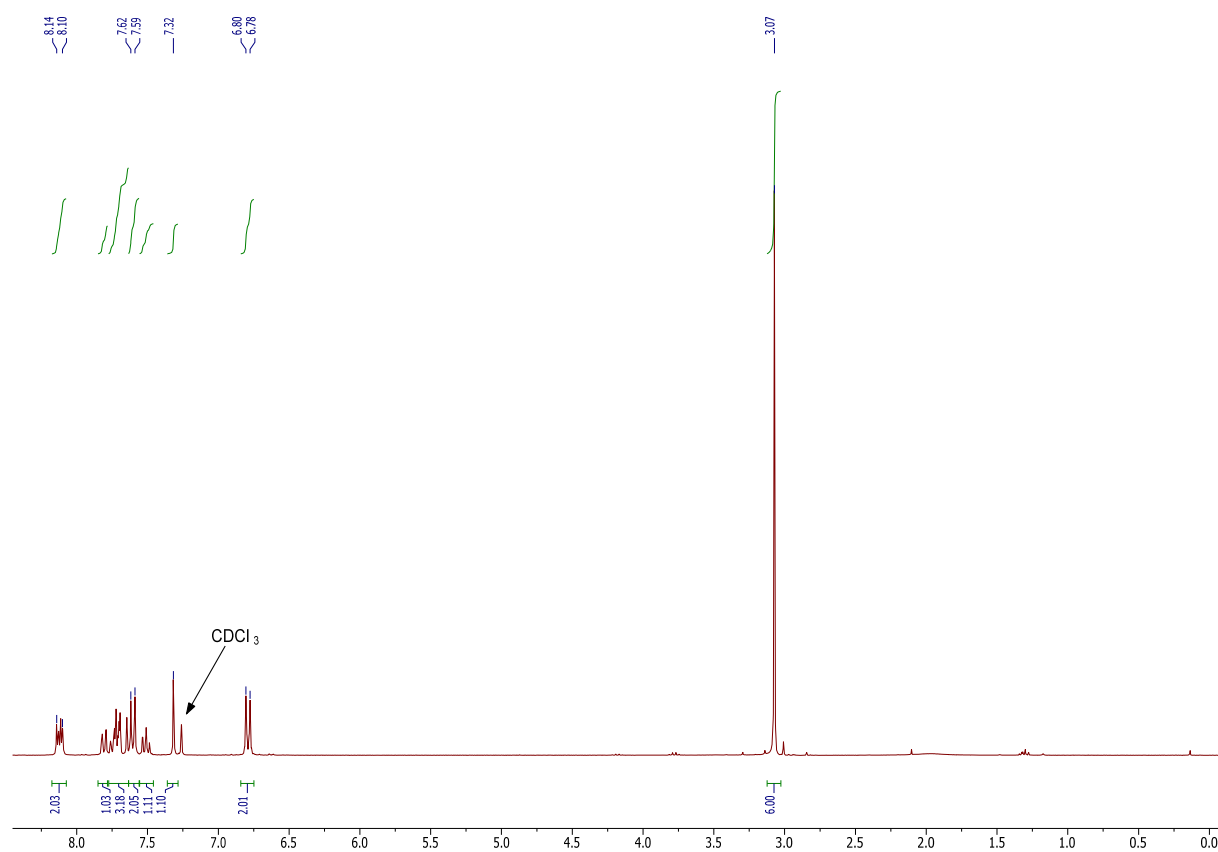

<sup>1</sup>H NMR (300 MHz) of **3a** (20 mg) in CDCl<sub>3</sub> at 298 K.

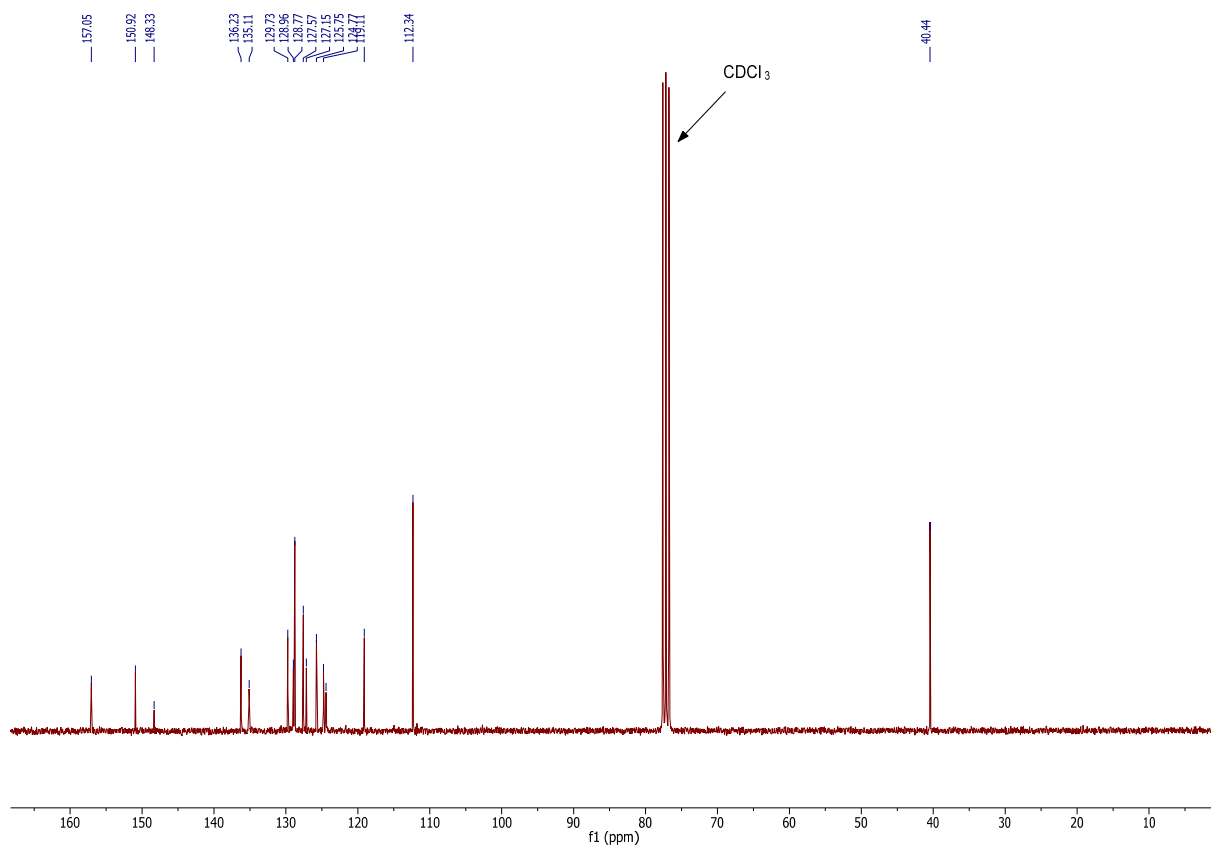

<sup>13</sup>C NMR (75 MHz) of **3a** (20 mg) in CDCl<sub>3</sub> at 298 K.

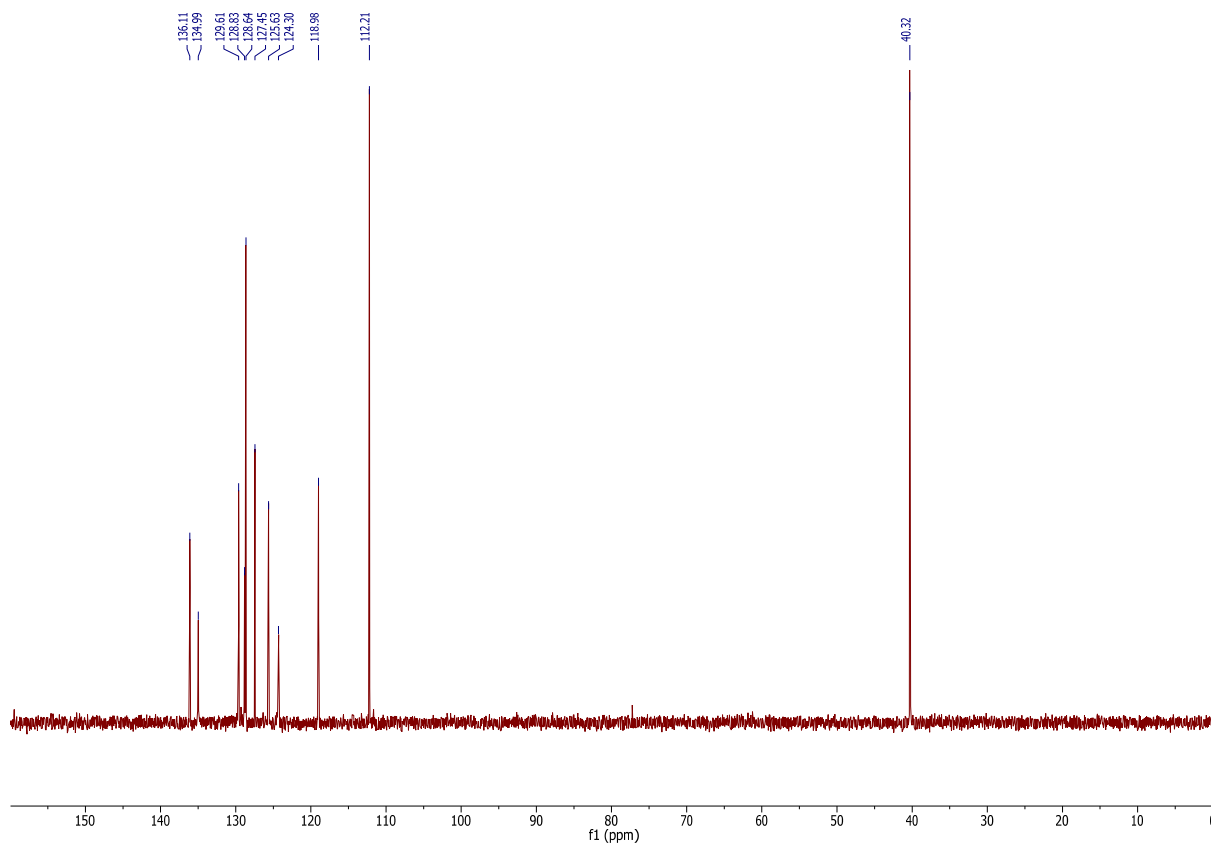

<sup>13</sup>C-DEPT 135 NMR (75 MHz) of **3a** (20 mg) in CDCl<sub>3</sub> at 298 K.

## 1.2 (*E*)-2-(4-Dimethylamino)styryl)-quinoline-6-trifluoromethane (**3b**)

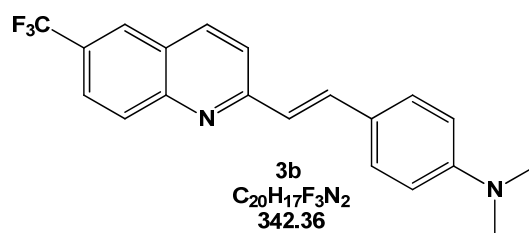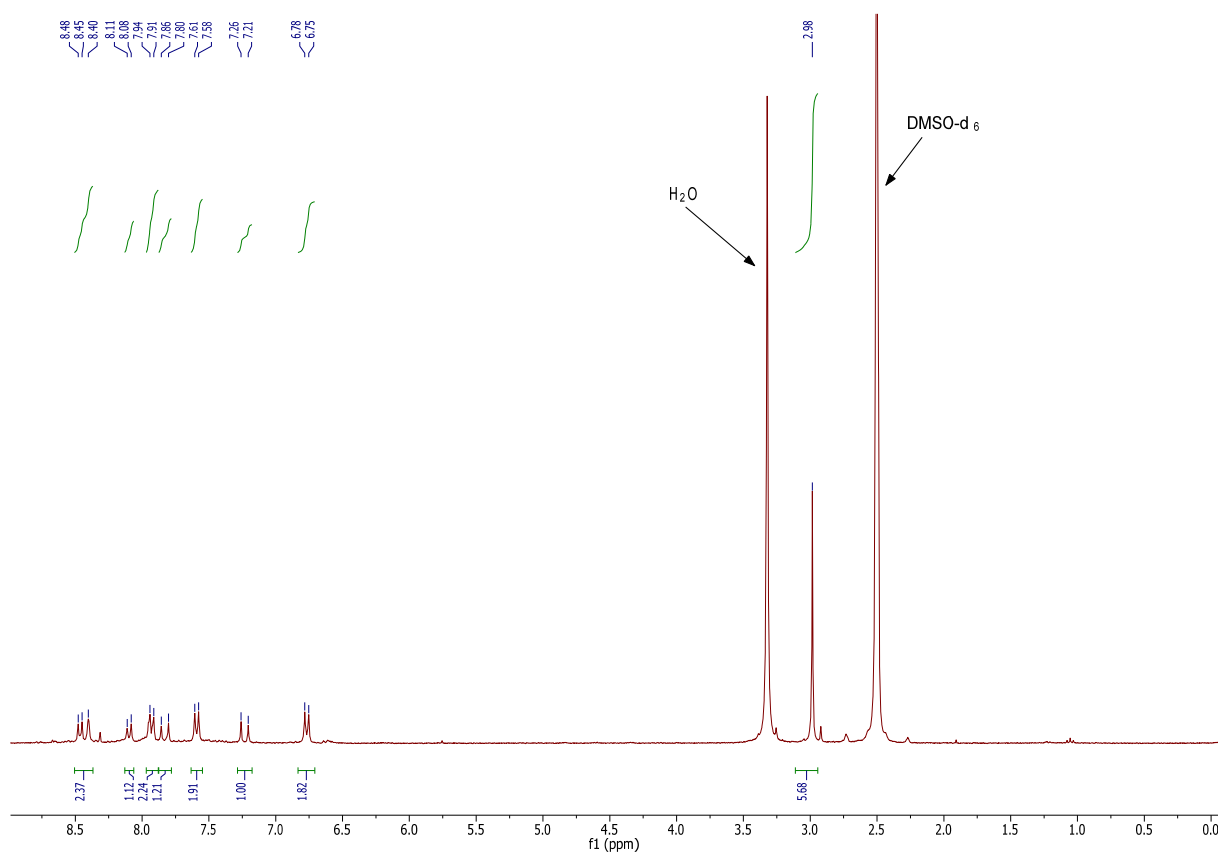

$^1\text{H}$  NMR (300 MHz) of **3b** (20 mg) in DMSO-d<sub>6</sub> at 298 K.

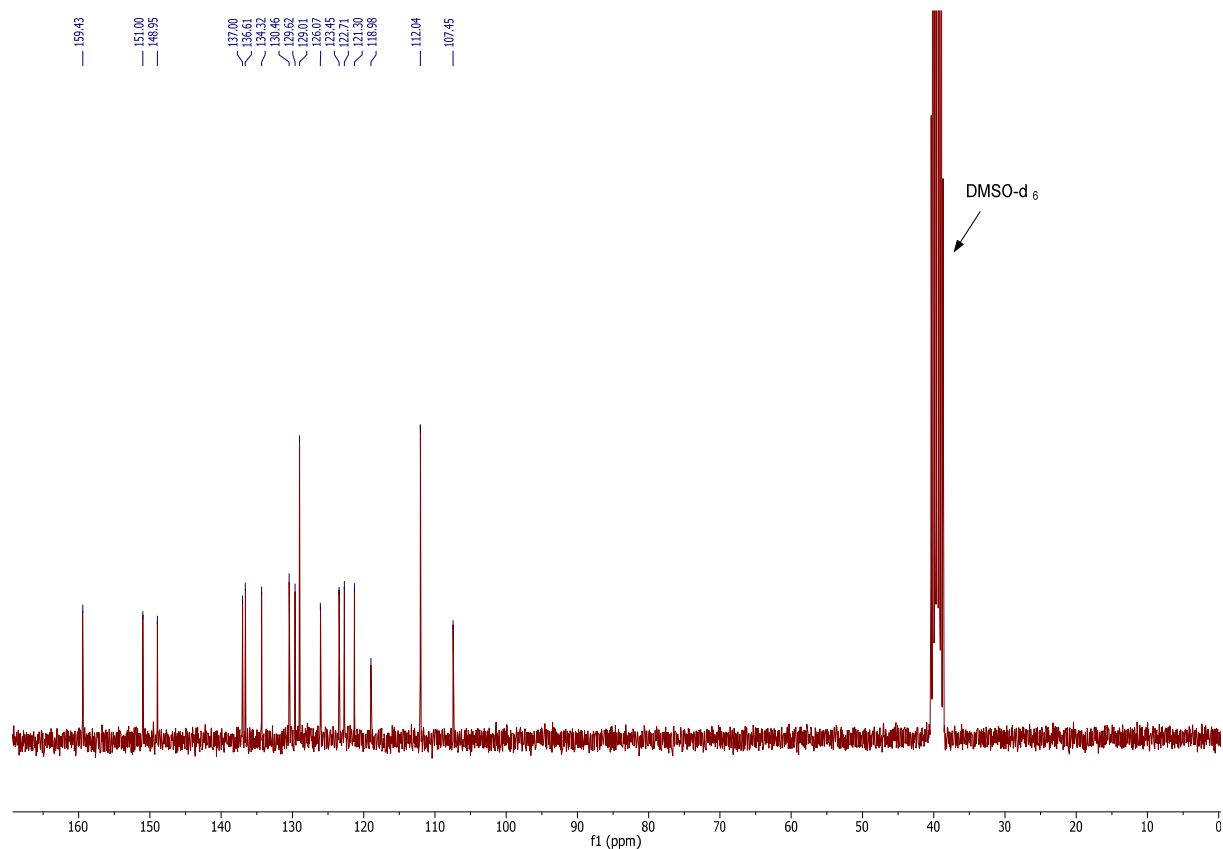

<sup>13</sup>C NMR (75 MHz) of **3c** (20 mg) in DMSO-d<sub>6</sub> at 298 K.

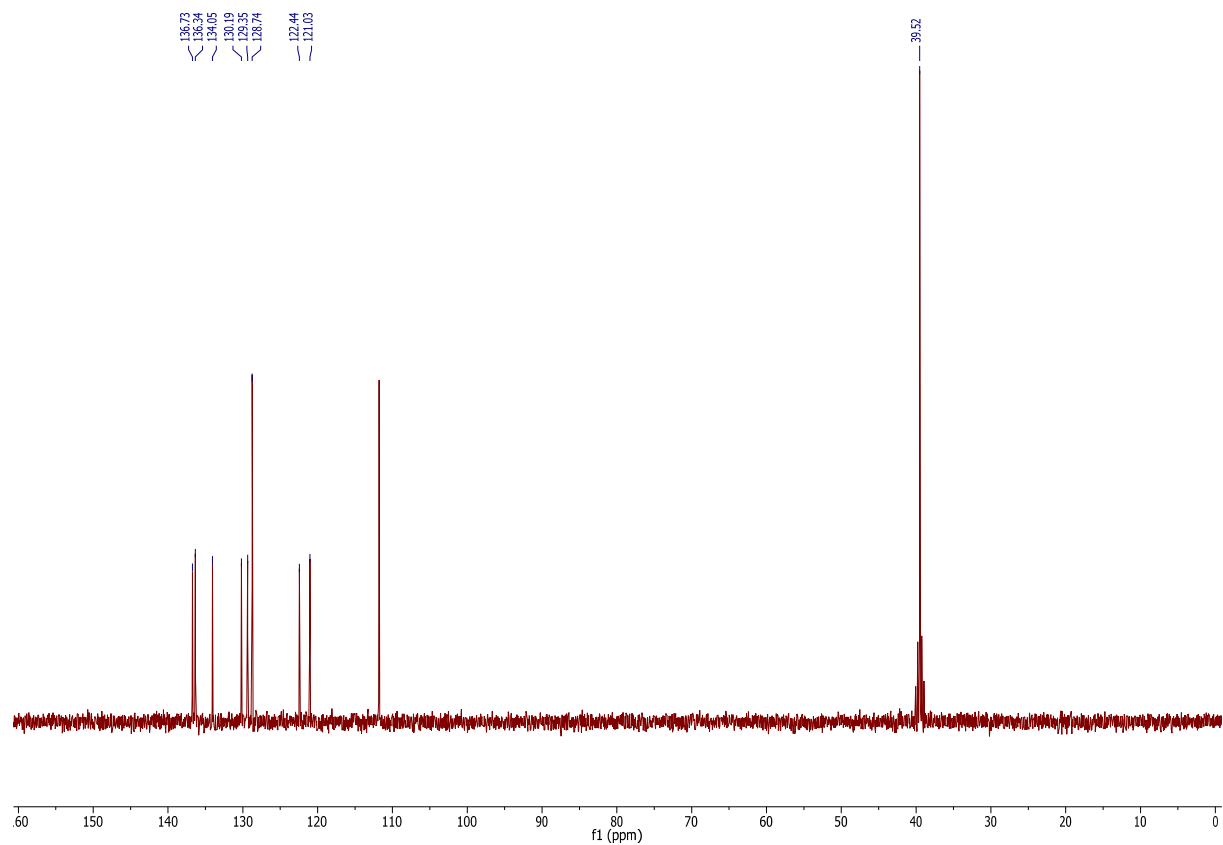

<sup>13</sup>C- DEPT 135 NMR (75 MHz) of **3c** (20 mg) in DMSO-d<sub>6</sub> at 298 K.

### 1.3 (*E*)-2-(4-Dimethylamino)styryl)-quinoline-6-carbonitril (**3c**)

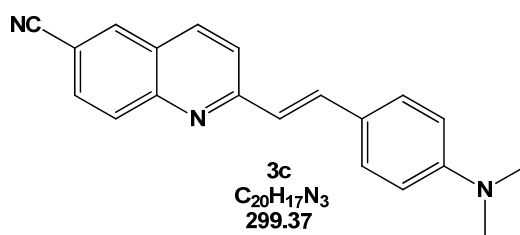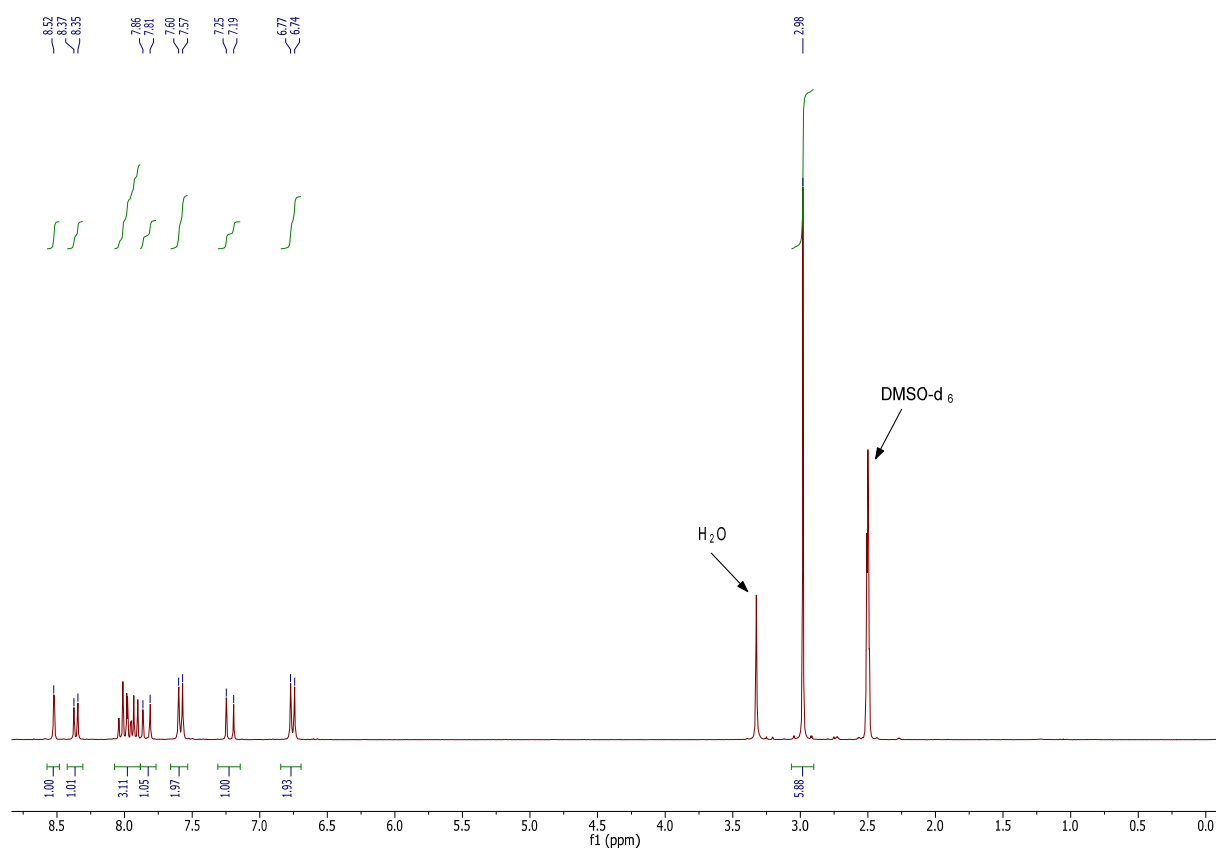

<sup>1</sup>H NMR (300 MHz) of **3c** (20 mg) in DMSO-d<sub>6</sub> at 298 K.

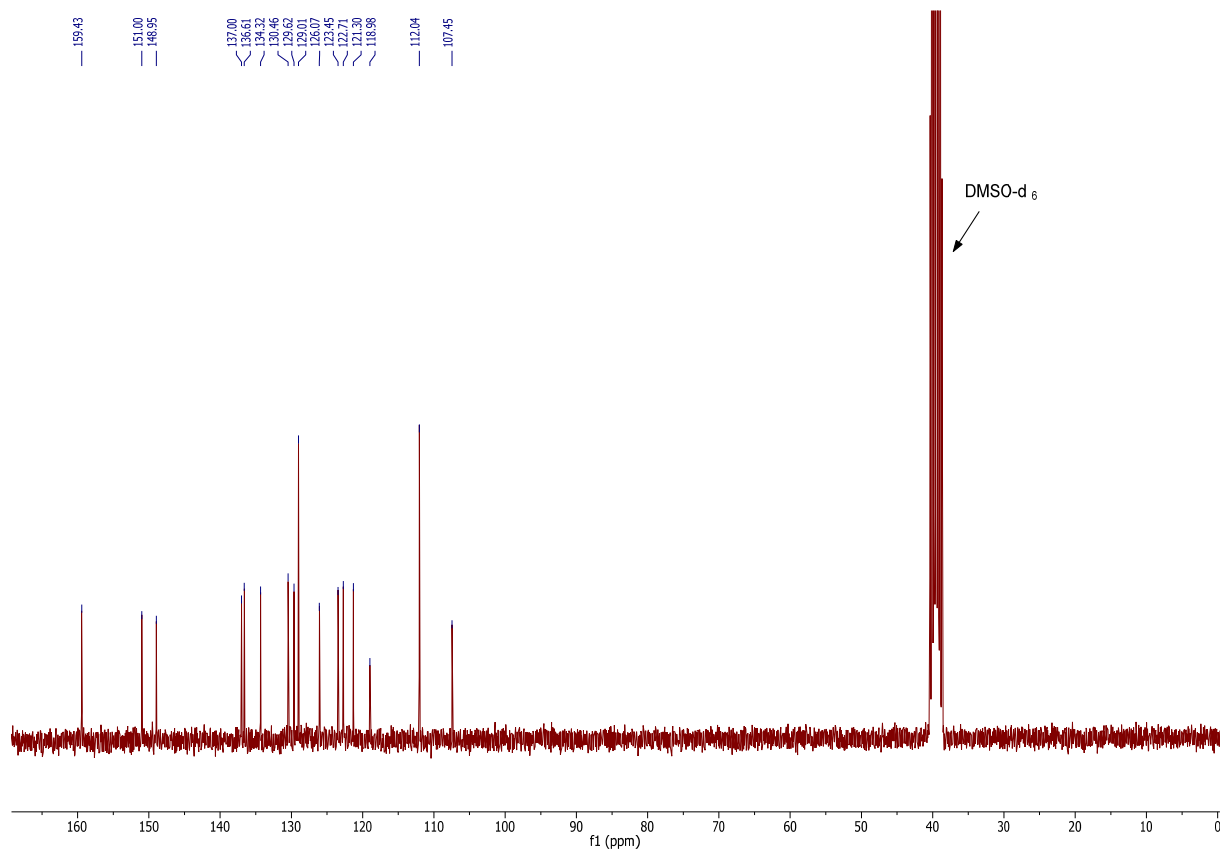

<sup>13</sup>C NMR (75 MHz) of **3c** (20 mg) in DMSO-d<sub>6</sub> at 298 K.

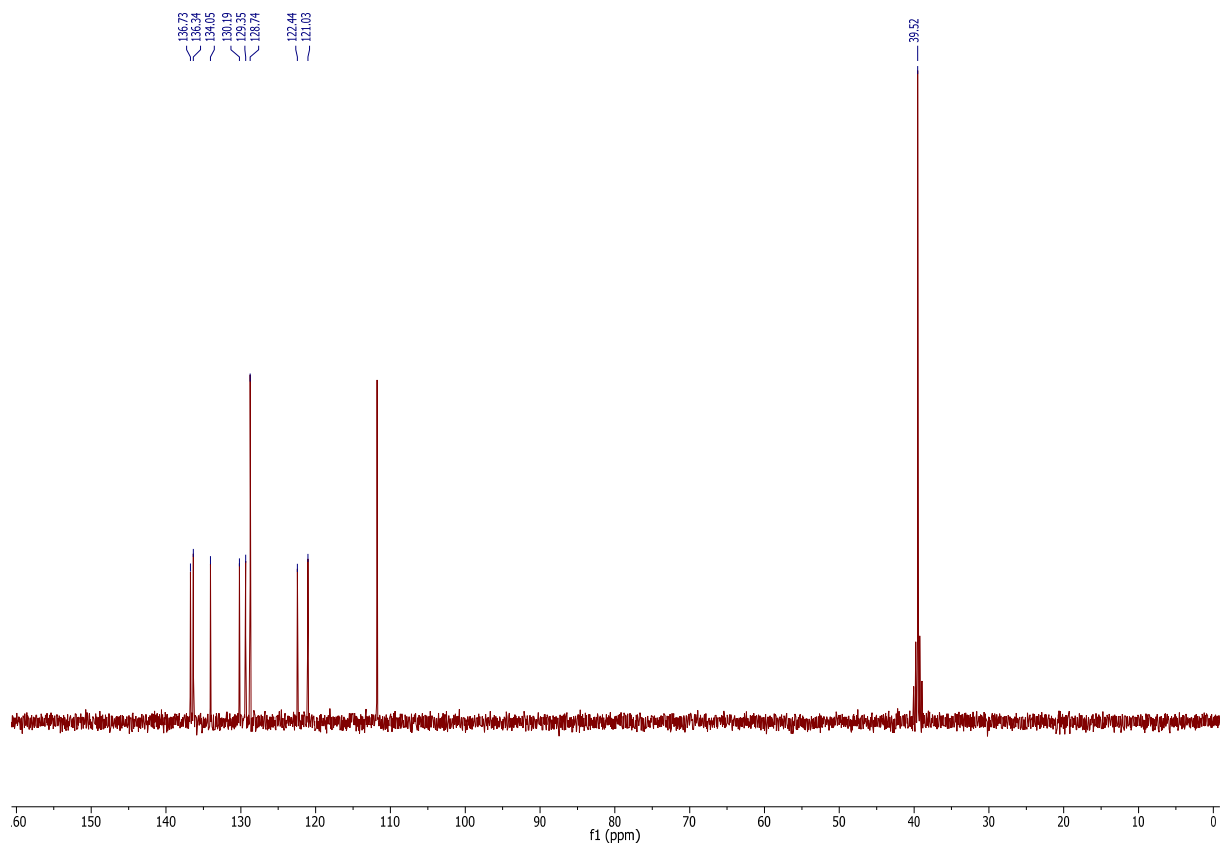

<sup>13</sup>C- DEPT 135 NMR (75 MHz) of **3c** (20 mg) in DMSO-d<sub>6</sub> at 298 K.

## 2 Selected UV/Vis and emission spectra of 2-styryl quinoline 3c

### Absorption and Emission Solvochromicity of Compound 3c

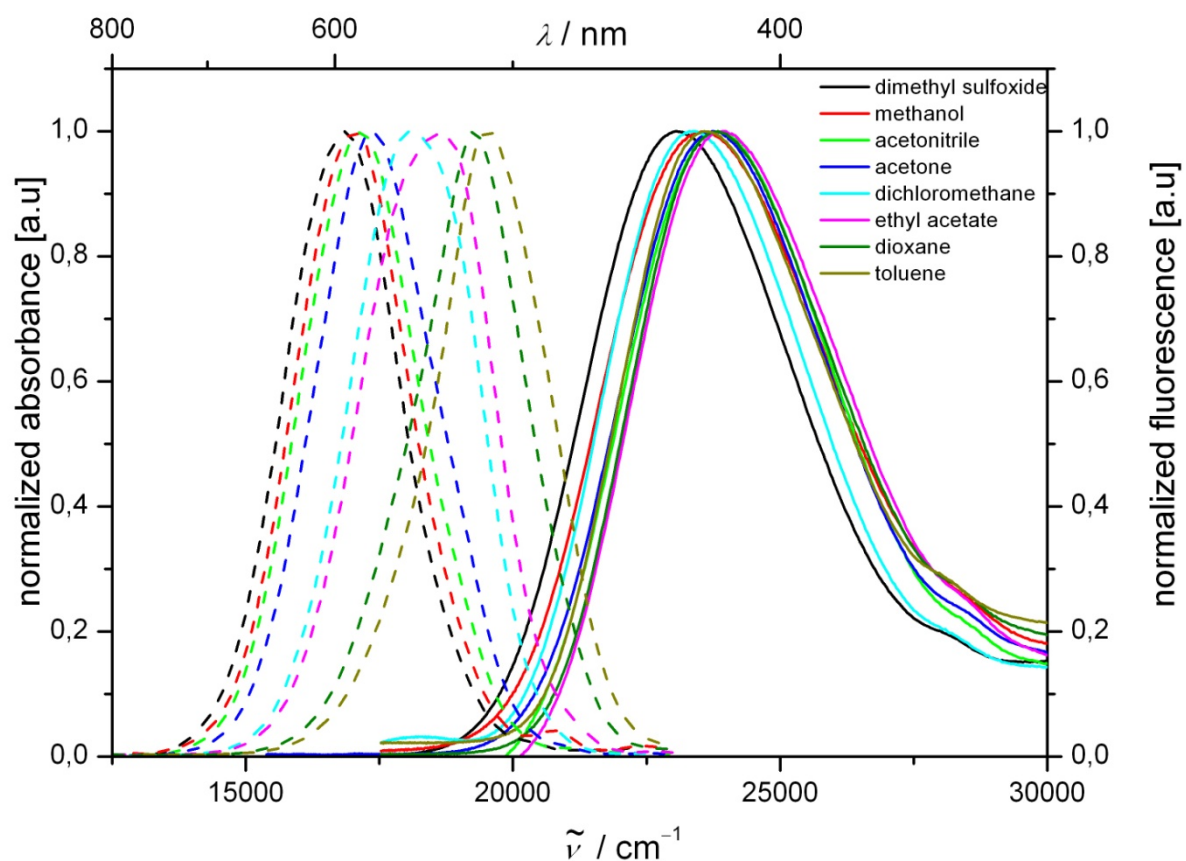

**Figure 1:** Normalized solvent dependent absorption and emission spectra of 2-styryl quinoline **3c** (recorded in DMSO, methanol, acetonitrile, acetone, CH<sub>2</sub>Cl<sub>2</sub>, ethyl acetate, dioxane and toluene:  $T = 293$  K,  $\lambda_{exc}$  = longest-wavelength  $\lambda_{max}$ ).



### Titration of **3c** with Trifluoroacetic Acid in Dichloromethane

Solutions of **3c** were prepared using spectroscopic grade dichloromethane purchased from OmniSolv. All absorption spectra were collected using a Shimadzu UV-2401PC spectrophotometer; emission spectra were acquired using a Shimadzu RF-5301PC spectrofluorophotometer. Increasing equivalents of trifluoroacetic acid (purchased from Acros) were added to solutions of **3c** using Eppendorf Reference variable volume pipettors.

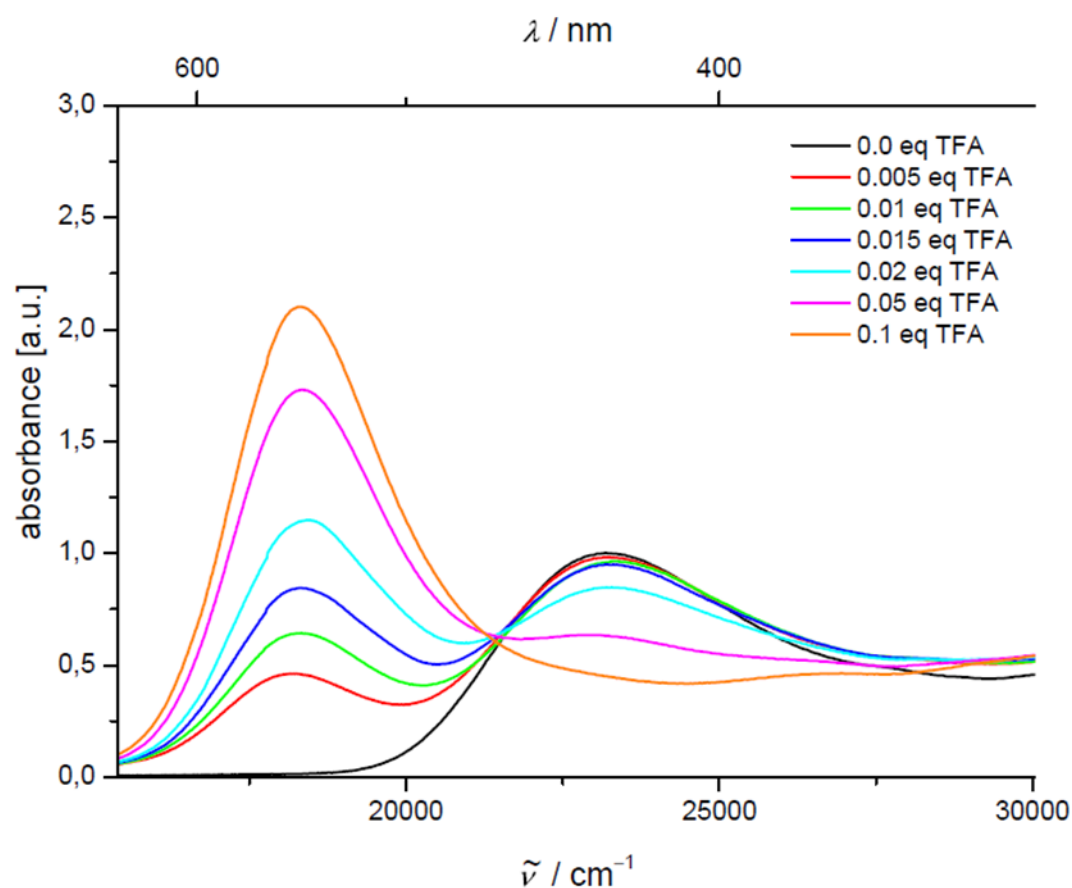

**Figure 2:** UV/Vis spectra of the titration of compound **3c** to the monoprotonated species **3c-H<sup>+</sup>** with trifluoroacetic acid (TFA) in  $\text{CH}_2\text{Cl}_2$  (recorded at room temperature).

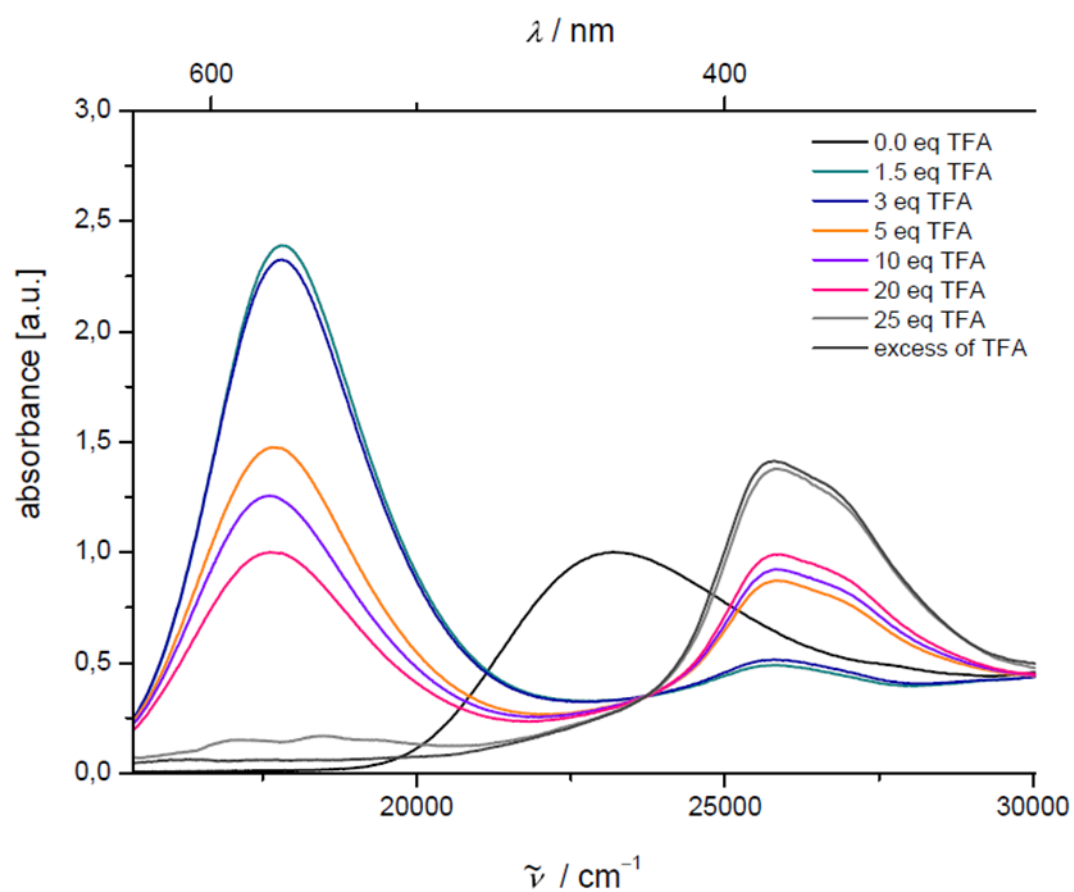

**Figure 3:** UV/Vis spectra of the titration of compound **3c-H<sup>+</sup>** to the diprotonated species **3c-2 H<sup>+</sup>** with trifluoroacetic acid (TFA) in CH<sub>2</sub>Cl<sub>2</sub> (recorded at room temperature). The black curve represents the free base **3c**.

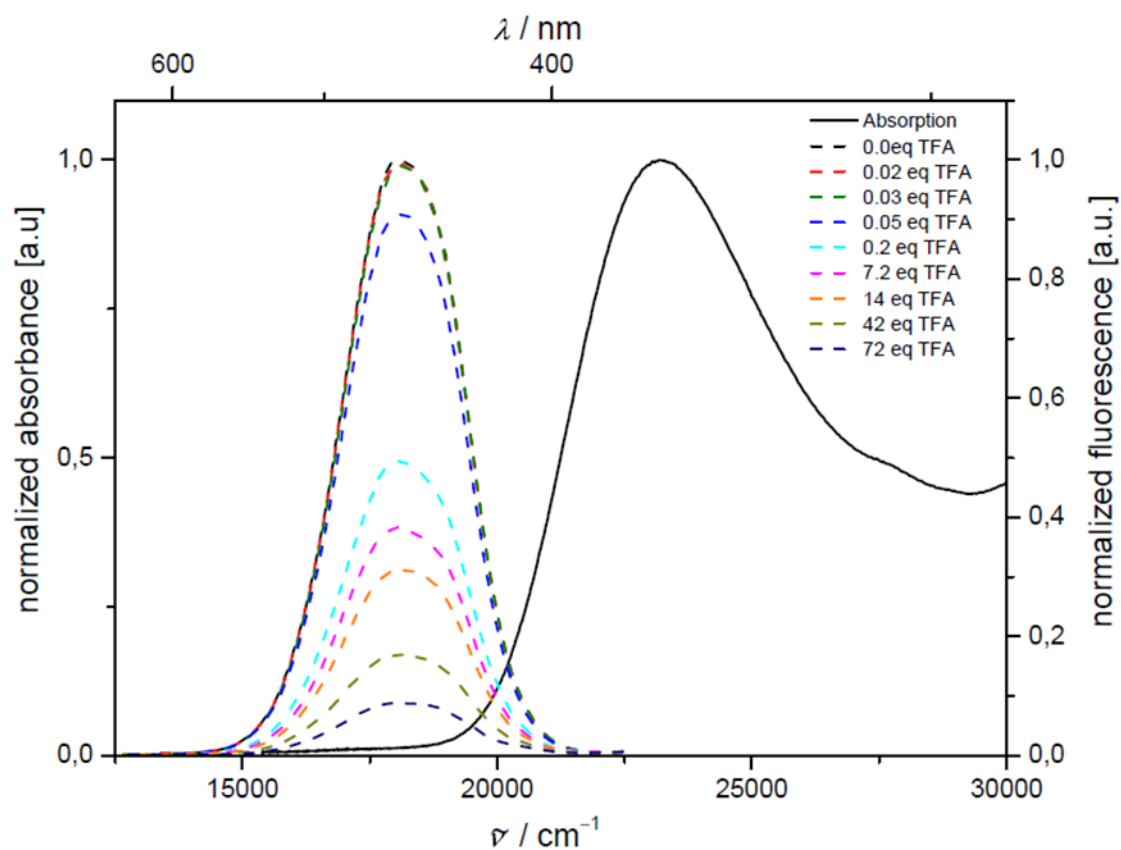

**Figure 4:** Absorption (solid line) and emission (dashed line) spectra of compound **3c** in CH<sub>2</sub>Cl<sub>2</sub>,  $T = 293$  K. Dependence of fluorescence emission spectra of gradually added TFA concentration.

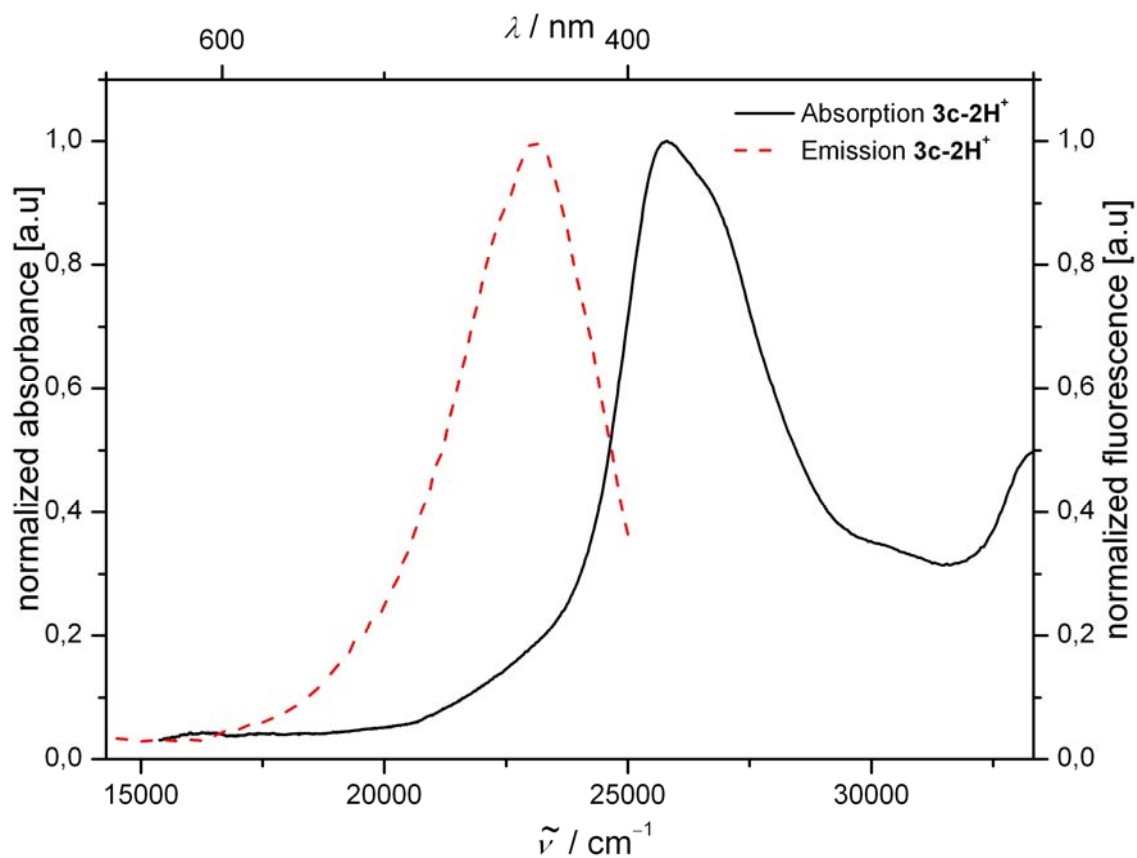

**Figure 5:** Absorption (solid line) and emission (dashed line) spectra of compound **3c-2H<sup>+</sup>** in  $\text{CH}_2\text{Cl}_2$ ,  $T = 293\text{ K}$ .

### 3 Determination of the pKa-Value of 3c

Since trifluoroacetic acid is completely dissociated in dichloromethane the pH-Value of a solution could be easily calculated as  $pH = -\log(cH^+)$ . This allows calculating the pH-Value in the UV-cuvette at any point of the titration if the concentration of the TFA is known. Drawing the intensity of the longest absorption maximum of **3c** and **3c-H<sup>+</sup>** and **3c-2H<sup>+</sup>** against the pH value the pKa-value could be determined at the point of intersection of these two lines.

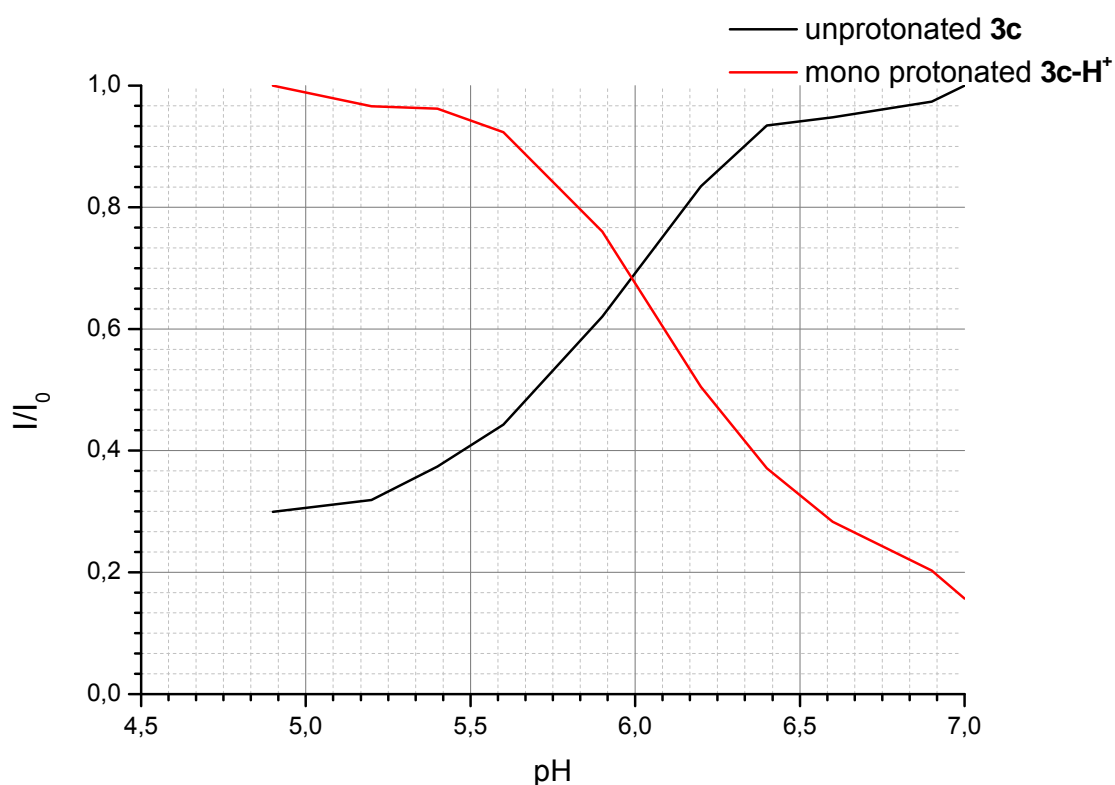

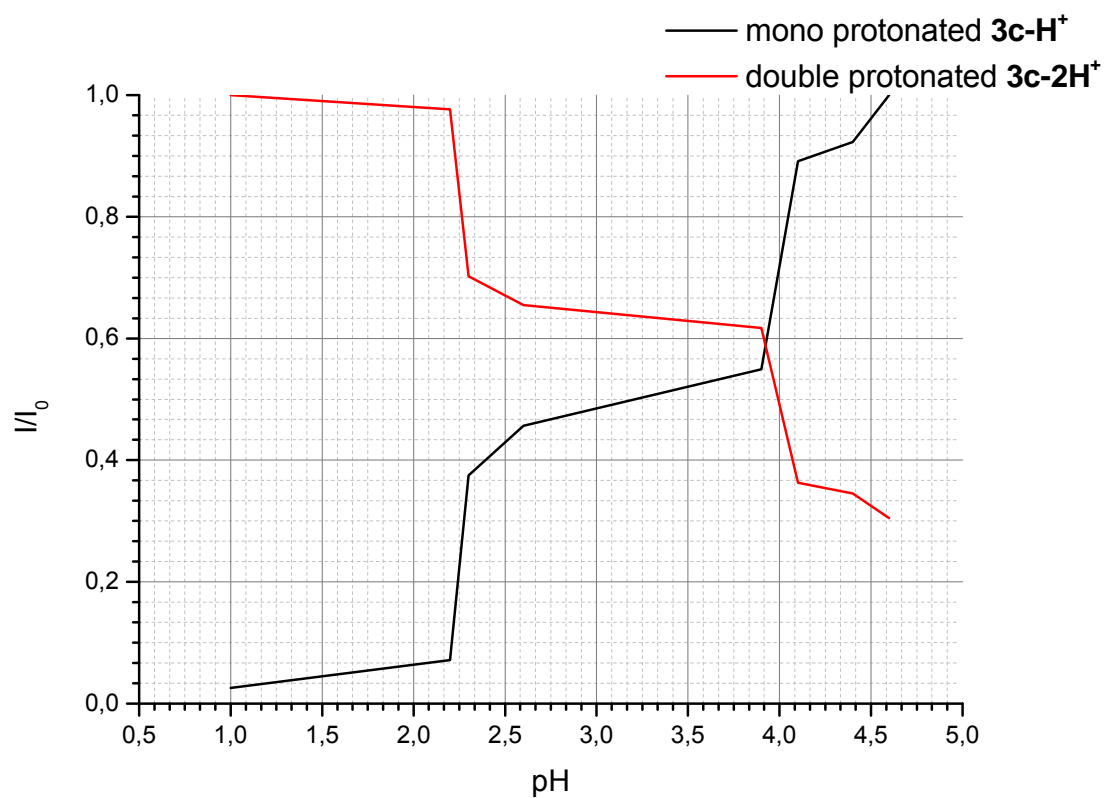

## 4 Computational details

### Computed xyz-Coordinates for the quinolines (**3**), their monoprotonated (**3-H<sup>+</sup>**), and diprotonated species (**3-2H<sup>+</sup>**)

The ground state geometries of the unprotonated **3**, the monoprotonated **3-H<sup>+</sup>** and double protonated quinolines **3-2H<sup>+</sup>** were optimized in by DFT calculation with the B3LYP functional and the 6-311G(d,p) basis set as implemented in the program package Gaussian09. The minima structures were confirmed by analytical frequency analysis.

XYZ-coordinates for **3a**:

|   |           |           |           |
|---|-----------|-----------|-----------|
| C | -6.683638 | 0.807221  | 0.012172  |
| C | -5.831931 | 1.937894  | 0.020221  |
| C | -4.465458 | 1.787144  | 0.017571  |
| C | -3.879715 | 0.492424  | 0.006709  |
| C | -4.744350 | -0.647782 | -0.001304 |
| C | -6.148276 | -0.459998 | 0.001630  |
| N | -2.525566 | 0.386275  | 0.004624  |
| C | -1.970186 | -0.821212 | -0.005346 |
| C | -2.761106 | -2.012395 | -0.013650 |
| C | -4.125729 | -1.923863 | -0.011750 |
| C | -0.512691 | -0.947113 | -0.008334 |
| C | 0.340074  | 0.099821  | -0.007737 |
| C | 1.792755  | 0.071756  | -0.011030 |
| C | 2.506549  | 1.284407  | -0.026882 |
| C | 3.890324  | 1.332308  | -0.033125 |
| C | 4.658818  | 0.142982  | -0.029450 |
| C | 3.943858  | -1.083492 | -0.000573 |
| C | 2.562222  | -1.108891 | 0.005111  |
| N | 6.031667  | 0.171602  | -0.056429 |
| C | 6.794942  | -1.063341 | 0.062726  |
| C | 6.737014  | 1.443216  | 0.023305  |
| H | -7.758634 | 0.945392  | 0.014373  |
| H | -6.265770 | 2.931562  | 0.028560  |
| H | -3.800624 | 2.642978  | 0.023712  |
| H | -6.793809 | -1.332295 | -0.004526 |
| H | -2.266403 | -2.976635 | -0.021643 |
| H | -4.742046 | -2.816958 | -0.018197 |
| H | -0.135187 | -1.964918 | -0.012991 |
| H | -0.108341 | 1.090105  | -0.006630 |
| H | 1.952754  | 2.218073  | -0.032140 |
| H | 4.377348  | 2.297282  | -0.040120 |
| H | 4.479435  | -2.022336 | 0.018920  |
| H | 2.069538  | -2.074611 | 0.027121  |



## 6 Calculation of the reorganization energy

---

17

|   |          |           |           |
|---|----------|-----------|-----------|
| H | 6.628894 | -1.564331 | 1.025193  |
| H | 6.540649 | -1.767154 | -0.735802 |
| H | 7.855165 | -0.834195 | -0.022393 |
| H | 6.451005 | 2.108625  | -0.797242 |
| H | 6.545611 | 1.966554  | 0.969095  |
| H | 7.806854 | 1.261205  | -0.054226 |

SCF Done: E(RB3LYP) = -844.576185892 Hartrees A.U. after 13 cycles

Sum of electronic and zero-point Energies= -844.255087 Hartrees

Sum of electronic and thermal Energies= -844.236788 Hartrees

Sum of electronic and thermal Enthalpies= -844.235844 Hartrees

Sum of electronic and thermal Free Energies= -844.303999 Hartrees

XYZ-coordinates for **3a-H<sup>+</sup>**:

|   |           |           |           |
|---|-----------|-----------|-----------|
| C | 6.715286  | -0.720995 | 0.011675  |
| C | 5.907059  | -1.873576 | 0.062121  |
| C | 4.529376  | -1.777103 | 0.071498  |
| C | 3.934389  | -0.505954 | 0.029280  |
| C | 4.730846  | 0.665337  | -0.021053 |
| C | 6.135722  | 0.529208  | -0.029029 |
| N | 2.561988  | -0.365558 | 0.037842  |
| C | 1.899384  | 0.816062  | -0.006596 |
| C | 2.697328  | 1.994103  | -0.050455 |
| C | 4.060426  | 1.921672  | -0.057974 |
| C | 0.475315  | 0.900103  | -0.008559 |
| C | -0.397008 | -0.153414 | -0.036976 |
| C | -1.825836 | -0.104536 | -0.027150 |
| C | -2.557715 | -1.314611 | -0.083622 |
| C | -3.932975 | -1.343224 | -0.072590 |
| C | -4.684750 | -0.136991 | -0.001705 |
| C | -3.951804 | 1.086381  | 0.053911  |
| C | -2.578462 | 1.094260  | 0.041312  |
| N | -6.042026 | -0.147174 | 0.013959  |
| C | -6.773800 | -1.411411 | -0.037571 |
| C | -6.796746 | 1.102778  | 0.087667  |
| H | 7.793281  | -0.821865 | 0.005028  |
| H | 6.370966  | -2.851860 | 0.093755  |
| H | 3.911078  | -2.666577 | 0.109627  |
| H | 6.747124  | 1.422901  | -0.067834 |
| H | 2.020874  | -1.219275 | 0.091821  |
| H | 2.189452  | 2.948146  | -0.081909 |
| H | 4.651180  | 2.829740  | -0.094157 |
| H | 0.095050  | 1.913625  | 0.004744  |
| H | 0.002271  | -1.164996 | -0.079281 |
| H | -2.014992 | -2.252371 | -0.138415 |
| H | -4.437711 | -2.297112 | -0.118462 |
| H | -4.477607 | 2.028421  | 0.109888  |

## 6 Calculation of the reorganization energy

---

19

|   |           |           |           |
|---|-----------|-----------|-----------|
| H | -2.071637 | 2.050642  | 0.089258  |
| H | -6.561095 | -1.958857 | -0.961130 |
| H | -6.521907 | -2.052596 | 0.812758  |
| H | -7.840146 | -1.204575 | -0.003203 |
| H | -6.579273 | 1.751308  | -0.766318 |
| H | -7.859280 | 0.874507  | 0.078097  |
| H | -6.573570 | 1.651390  | 1.008010  |

SCF Done: E(RB3LYP) = -845.029471412 Hartrees      A.U. after 13 cycles

Sum of electronic and zero-point Energies=                    -844.693841 Hartrees

Sum of electronic and thermal Energies=                    -844.675526 Hartrees

Sum of electronic and thermal Enthalpies=                   -844.674582 Hartrees

Sum of electronic and thermal Free Energies=                -844.741887 Hartrees

XYZ-coordinates for **3a-2H<sup>+</sup>**:

|   |           |           |           |
|---|-----------|-----------|-----------|
| C | 6.733309  | -0.792140 | 0.034415  |
| C | 5.902589  | -1.934166 | -0.019624 |
| C | 4.530211  | -1.817069 | -0.049822 |
| C | 3.960046  | -0.532380 | -0.024569 |
| C | 4.777222  | 0.629560  | 0.028765  |
| C | 6.183023  | 0.467339  | 0.057850  |
| N | 2.595680  | -0.364740 | -0.052380 |
| C | 1.965319  | 0.825228  | -0.027187 |
| C | 2.764863  | 1.986757  | 0.018140  |
| C | 4.134627  | 1.890085  | 0.046148  |
| C | 0.518645  | 0.925822  | -0.044863 |
| C | -0.354228 | -0.100144 | 0.014626  |
| C | -1.812293 | -0.004401 | -0.001050 |
| C | -2.557806 | -1.191120 | 0.106794  |
| C | -3.946420 | -1.176213 | 0.100717  |
| C | -4.597603 | 0.044962  | -0.015693 |
| C | -3.892347 | 1.238213  | -0.129418 |
| C | -2.505671 | 1.211907  | -0.121276 |
| N | -6.080910 | 0.100677  | -0.024953 |
| C | -6.684067 | -0.634074 | -1.199190 |
| C | -6.695674 | -0.336673 | 1.284968  |
| H | 7.808426  | -0.916454 | 0.057206  |
| H | 6.352142  | -2.919196 | -0.037297 |
| H | 3.895816  | -2.694712 | -0.090636 |
| H | 6.810313  | 1.349344  | 0.098918  |
| H | 2.037529  | -1.208981 | -0.105598 |
| H | 2.273861  | 2.949556  | 0.033945  |
| H | 4.739007  | 2.788779  | 0.082924  |
| H | 0.160136  | 1.946227  | -0.096360 |
| H | 0.011513  | -1.120489 | 0.090776  |
| H | -2.043058 | -2.139921 | 0.197535  |
| H | -4.490515 | -2.107940 | 0.183555  |
| H | -4.414273 | 2.183275  | -0.226368 |

## 6 Calculation of the reorganization energy

21

|   |           |           |           |
|---|-----------|-----------|-----------|
| H | -1.971746 | 2.148070  | -0.213207 |
| H | -6.330697 | 1.085526  | -0.141661 |
| H | -7.755940 | -0.450772 | -1.196073 |
| H | -6.230798 | -0.253205 | -2.110731 |
| H | -6.481993 | -1.695392 | -1.085518 |
| H | -7.769913 | -0.179014 | 1.220299  |
| H | -6.267030 | 0.264829  | 2.082315  |
| H | -6.478628 | -1.390053 | 1.438915  |

SCF Done: E(RB3LYP) = -845.446092208 Hartrees      A.U. after 12 cycles  
Sum of electronic and zero-point Energies=                      -845.093934 Hartrees  
Sum of electronic and thermal Energies=                         -845.076180 Hartrees  
Sum of electronic and thermal Enthalpies=                      -845.075236 Hartrees  
Sum of electronic and thermal Free Energies=                    -845.140363 Hartrees

XYZ-coordinates for **3b**:

|   |           |           |           |
|---|-----------|-----------|-----------|
| C | -5.150602 | -0.339111 | -0.002791 |
| C | -4.361148 | -1.517872 | 0.006946  |
| C | -2.993164 | -1.433580 | 0.009497  |
| C | -2.340270 | -0.169476 | 0.002895  |
| C | -3.145051 | 1.012060  | -0.006139 |
| C | -4.554320 | 0.900699  | -0.008910 |
| N | -0.985762 | -0.134876 | 0.005201  |
| C | -0.368359 | 1.044550  | -0.000889 |
| C | -1.098825 | 2.274755  | -0.009267 |
| C | -2.465218 | 2.257192  | -0.012133 |
| C | 1.090119  | 1.096352  | 0.000398  |
| C | 1.886075  | 0.003455  | 0.001895  |
| C | 3.335555  | -0.047188 | 0.002612  |
| C | -6.642130 | -0.480227 | 0.000276  |
| F | -7.083849 | -1.214465 | -1.052412 |
| F | -7.284501 | 0.705728  | -0.052865 |
| F | -7.088961 | -1.118383 | 1.112280  |
| C | 3.982848  | -1.297587 | -0.007776 |
| C | 5.361138  | -1.419819 | -0.009714 |
| C | 6.192310  | -0.272315 | -0.000959 |
| C | 5.544547  | 0.992307  | 0.011581  |
| C | 4.167158  | 1.091481  | 0.012986  |
| N | 7.558801  | -0.374751 | -0.004292 |
| C | 8.388683  | 0.822523  | 0.010934  |
| C | 8.196392  | -1.684302 | -0.011523 |
| H | -4.846521 | -2.486472 | 0.010751  |
| H | -2.375892 | -2.323485 | 0.016084  |
| H | -5.156501 | 1.800841  | -0.016523 |
| H | -0.555403 | 3.212118  | -0.013704 |
| H | -3.035560 | 3.179923  | -0.018880 |
| H | 1.520450  | 2.092766  | -0.001627 |
| H | 1.383872  | -0.960686 | 0.001339  |
| H | 3.379273  | -2.199794 | -0.015002 |

## 6 Calculation of the reorganization energy

23

|   |          |           |           |
|---|----------|-----------|-----------|
| H | 5.796602 | -2.409068 | -0.018060 |
| H | 6.130340 | 1.900896  | 0.020561  |
| H | 3.726374 | 2.081993  | 0.023516  |
| H | 8.213796 | 1.427246  | 0.908102  |
| H | 9.435855 | 0.528611  | 0.002286  |
| H | 8.206981 | 1.453240  | -0.866539 |
| H | 7.928766 | -2.271743 | 0.874409  |
| H | 7.921422 | -2.264322 | -0.899880 |
| H | 9.276255 | -1.553971 | -0.015732 |

SCF Done: E(RB3LYP) = -1181.71659528 Hartrees      A.U. after 13 cycles

Sum of electronic and zero-point Energies=      -1181.391320 Hartrees

Sum of electronic and thermal Energies=      -1181.369210 Hartrees

Sum of electronic and thermal Enthalpies=      -1181.368266 Hartrees

Sum of electronic and thermal Free Energies=      -1181.447615 Hartrees

XYZ-coordinates for **3b-H<sup>+</sup>**:

|   |           |           |           |
|---|-----------|-----------|-----------|
| C | -5.180269 | -0.321266 | -0.021353 |
| C | -4.427550 | -1.512907 | -0.074593 |
| C | -3.050909 | -1.473060 | -0.081574 |
| C | -2.398360 | -0.228931 | -0.033647 |
| C | -3.141591 | 0.974044  | 0.018499  |
| C | -4.548763 | 0.903287  | 0.024246  |
| N | -1.023691 | -0.151791 | -0.040152 |
| C | -0.307700 | 1.002146  | 0.007263  |
| C | -1.055936 | 2.214779  | 0.053085  |
| C | -2.418922 | 2.203637  | 0.059157  |
| C | 1.113419  | 1.024485  | 0.010356  |
| C | 1.939415  | -0.070226 | 0.037218  |
| C | 3.364679  | -0.086078 | 0.026781  |
| C | -6.680524 | -0.417818 | -0.000191 |
| F | -7.146278 | -1.155969 | -1.033934 |
| F | -7.277147 | 0.788137  | -0.068792 |
| F | -7.124448 | -1.018014 | 1.129158  |
| C | 4.041502  | -1.329493 | 0.090133  |
| C | 5.412539  | -1.419802 | 0.079819  |
| C | 6.218403  | -0.247715 | 0.003147  |
| C | 5.541545  | 1.008621  | -0.060243 |
| C | 4.171395  | 1.078568  | -0.048850 |
| N | 7.571545  | -0.319403 | -0.011062 |
| C | 8.383711  | 0.894992  | -0.086364 |
| C | 8.246347  | -1.616061 | 0.036981  |
| H | -4.934192 | -2.468922 | -0.114356 |
| H | -2.475973 | -2.390152 | -0.124653 |
| H | -5.123230 | 1.819223  | 0.063049  |
| H | -0.520411 | -1.028297 | -0.094728 |
| H | -0.506396 | 3.145175  | 0.088431  |
| H | -2.970153 | 3.135858  | 0.097275  |
| H | 1.539327  | 2.019599  | 0.000029  |
| H | 1.493951  | -1.062048 | 0.080077  |



## 6 Calculation of the reorganization energy

25

|   |          |           |           |
|---|----------|-----------|-----------|
| H | 3.456649 | -2.241342 | 0.150698  |
| H | 5.873970 | -2.394927 | 0.131702  |
| H | 6.109651 | 1.925334  | -0.122414 |
| H | 3.708052 | 2.056257  | -0.104790 |
| H | 8.189179 | 1.556338  | 0.762810  |
| H | 9.434343 | 0.618174  | -0.067184 |
| H | 8.191740 | 1.447000  | -1.011415 |
| H | 8.007334 | -2.155647 | 0.958316  |
| H | 7.966764 | -2.241342 | -0.816263 |
| H | 9.320688 | -1.456534 | 0.004804  |

SCF Done: E(RB3LYP) = -1182.16532240 Hartrees      A.U. after 13 cycles

Sum of electronic and zero-point Energies=                    -1181.825489 Hartrees

Sum of electronic and thermal Energies=                    -1181.803489 Hartrees

Sum of electronic and thermal Enthalpies=                   -1181.802545 Hartrees

Sum of electronic and thermal Free Energies=                -1181.879664 Hartrees

XYZ-coordinates for **3b-2H<sup>+</sup>**:

|   |           |           |           |
|---|-----------|-----------|-----------|
| C | -5.223084 | -0.280779 | 0.007920  |
| C | -4.493256 | -1.489849 | 0.101493  |
| C | -3.119680 | -1.480703 | 0.131658  |
| C | -2.444104 | -0.247924 | 0.067109  |
| C | -3.161261 | 0.972457  | -0.023179 |
| C | -4.574504 | 0.928301  | -0.053194 |
| N | -1.072015 | -0.193517 | 0.095812  |
| C | -0.347089 | 0.941436  | 0.040933  |
| C | -1.049502 | 2.163812  | -0.034123 |
| C | -2.421068 | 2.179279  | -0.069661 |
| C | 1.100911  | 0.922202  | 0.059522  |
| C | 1.881414  | -0.168950 | -0.083520 |
| C | 3.341147  | -0.201669 | -0.069973 |
| C | -6.728078 | -0.352835 | -0.013337 |
| F | -7.210133 | -0.868299 | 1.139040  |
| F | -7.165451 | -1.152518 | -1.010315 |
| F | -7.298023 | 0.853727  | -0.183222 |
| C | 3.981027  | -1.416898 | -0.360610 |
| C | 5.367545  | -1.512968 | -0.370524 |
| C | 6.120098  | -0.384111 | -0.080509 |
| C | 5.519098  | 0.836057  | 0.219839  |
| C | 4.136107  | 0.921903  | 0.222421  |
| N | 7.599521  | -0.502521 | -0.076780 |
| C | 8.272164  | 0.447821  | -1.039690 |
| C | 8.184586  | -0.402550 | 1.314119  |
| H | -5.021696 | -2.433663 | 0.147139  |
| H | -2.564049 | -2.407583 | 0.203607  |
| H | -5.130684 | 1.853173  | -0.124648 |
| H | -0.582363 | -1.076829 | 0.185442  |
| H | -0.480156 | 3.081777  | -0.072265 |
| H | -2.950555 | 3.122439  | -0.134175 |
| H | 1.544530  | 1.903355  | 0.171712  |
| H | 1.425817  | -1.141191 | -0.252104 |

## 6 Calculation of the reorganization energy

27

|   |          |           |           |
|---|----------|-----------|-----------|
| H | 3.389075 | -2.296035 | -0.583860 |
| H | 5.842969 | -2.460092 | -0.598858 |
| H | 6.105957 | 1.715364  | 0.451497  |
| H | 3.681460 | 1.873805  | 0.462315  |
| H | 7.813827 | -1.445159 | -0.409712 |
| H | 9.333770 | 0.212376  | -1.055953 |
| H | 7.831630 | 0.307392  | -2.023231 |
| H | 8.119109 | 1.465697  | -0.692952 |
| H | 9.250113 | -0.610596 | 1.246922  |
| H | 7.689721 | -1.135423 | 1.946592  |
| H | 8.016625 | 0.603086  | 1.689619  |

SCF Done: E(RB3LYP) = -1182.57956883 Hartrees      A.U. after 12 cycles

Sum of electronic and zero-point Energies=                    -1182.223857 Hartrees

Sum of electronic and thermal Energies=                    -1182.202252 Hartrees

Sum of electronic and thermal Enthalpies=                   -1182.201308 Hartrees

Sum of electronic and thermal Free Energies=                -1182.276539 Hartrees

XYZ-coordinates for **3c**:

|   |           |           |           |
|---|-----------|-----------|-----------|
| C | -6.023045 | -0.553202 | -0.005658 |
| C | -5.200086 | -1.715448 | -0.005515 |
| C | -3.835729 | -1.593364 | -0.002872 |
| C | -3.214152 | -0.313460 | -0.000230 |
| C | -4.047600 | 0.850634  | -0.000388 |
| C | -5.449027 | 0.708549  | -0.003123 |
| N | -1.862574 | -0.246586 | 0.002331  |
| C | -1.272365 | 0.947903  | 0.004820  |
| C | -2.032198 | 2.161787  | 0.004855  |
| C | -3.396466 | 2.113117  | 0.002293  |
| C | 0.181986  | 1.034702  | 0.007590  |
| C | 1.003631  | -0.040461 | 0.007751  |
| C | 2.452257  | -0.058098 | 0.010391  |
| C | 3.127040  | -1.294465 | 0.009818  |
| C | 4.507090  | -1.386120 | 0.012186  |
| C | 5.312719  | -0.220051 | 0.015320  |
| C | 4.637288  | 1.030504  | 0.016003  |
| C | 3.258502  | 1.099361  | 0.013596  |
| N | 6.680262  | -0.292768 | 0.017583  |
| C | 7.346189  | -1.588545 | 0.017389  |
| C | 7.484736  | 0.922232  | 0.021315  |
| C | -7.444030 | -0.693264 | -0.008426 |
| N | -8.594179 | -0.814116 | -0.010675 |
| H | -5.665310 | -2.693213 | -0.007515 |
| H | -3.195995 | -2.467231 | -0.002725 |
| H | -6.075246 | 1.593036  | -0.003231 |
| H | -1.510280 | 3.111224  | 0.006931  |
| H | -3.988668 | 3.021772  | 0.002275  |
| H | 0.588938  | 2.040619  | 0.009566  |
| H | 0.523397  | -1.015588 | 0.005621  |
| H | 2.543273  | -2.209587 | 0.007431  |
| H | 4.964664  | -2.365307 | 0.011611  |
| H | 5.203352  | 1.951493  | 0.018462  |

## 6 Calculation of the reorganization energy

29

|   |          |           |           |
|---|----------|-----------|-----------|
| H | 2.795842 | 2.079937  | 0.014269  |
| H | 7.088715 | -2.176692 | -0.870832 |
| H | 8.422906 | -1.434933 | 0.019224  |
| H | 7.085905 | -2.178503 | 0.903608  |
| H | 7.294539 | 1.537535  | -0.865247 |
| H | 7.291858 | 1.533981  | 0.909778  |
| H | 8.537906 | 0.650545  | 0.022331  |

SCF Done: E(RB3LYP) = -936.845636114 Hartrees      A.U. after 6 cycles  
Sum of electronic and zero-point Energies=                      -936.525941 Hartrees  
Sum of electronic and thermal Energies=                      -936.505744 Hartrees  
Sum of electronic and thermal Enthalpies=                      -936.504800 Hartrees  
Sum of electronic and thermal Free Energies=                      -936.578083 Hartrees

XYZ-coordinates for **3c-H<sup>+</sup>**:

|   |           |           |           |
|---|-----------|-----------|-----------|
| C | 1.386141  | 5.423241  | 4.175402  |
| C | 2.303936  | 5.069621  | 3.157213  |
| C | 2.053117  | 3.996932  | 2.331690  |
| C | 0.874309  | 3.251095  | 2.504883  |
| C | -0.053941 | 3.590594  | 3.519766  |
| C | 0.221097  | 4.688327  | 4.351801  |
| N | 0.595979  | 2.174495  | 1.695012  |
| C | -0.518793 | 1.399641  | 1.782145  |
| C | -1.450046 | 1.736603  | 2.809514  |
| C | -1.230001 | 2.788889  | 3.645193  |
| C | -0.765060 | 0.307932  | 0.910203  |
| C | 0.017640  | -0.072788 | -0.152204 |
| C | -0.191132 | -1.168297 | -1.036702 |
| C | 0.723505  | -1.380851 | -2.099121 |
| C | 0.588424  | -2.420448 | -2.986116 |
| C | -0.493624 | -3.340419 | -2.869432 |
| C | -1.420169 | -3.130004 | -1.801950 |
| C | -1.268781 | -2.085776 | -0.926050 |
| N | -0.638588 | -4.373428 | -3.732733 |
| C | -1.757999 | -5.306814 | -3.601810 |
| C | 0.329008  | -4.581982 | -4.810061 |
| C | 1.662982  | 6.541146  | 5.022241  |
| N | 1.890587  | 7.445410  | 5.704045  |
| H | 3.208650  | 5.649305  | 3.029133  |
| H | 2.758537  | 3.730604  | 1.553939  |
| H | -0.482607 | 4.954870  | 5.129823  |
| H | 1.286043  | 1.946385  | 0.990455  |
| H | -2.341024 | 1.130877  | 2.899732  |
| H | -1.950685 | 3.031143  | 4.417225  |
| H | -1.670467 | -0.241201 | 1.134450  |
| H | 0.907025  | 0.509952  | -0.383257 |
| H | 1.557325  | -0.696753 | -2.215647 |
| H | 1.314896  | -2.532774 | -3.777314 |

## 6 Calculation of the reorganization energy

31

|   |           |           |           |
|---|-----------|-----------|-----------|
| H | -2.255381 | -3.802603 | -1.672236 |
| H | -1.996069 | -1.974323 | -0.130935 |
| H | -1.726029 | -5.835861 | -2.644672 |
| H | -2.717865 | -4.789278 | -3.684670 |
| H | -1.698756 | -6.042371 | -4.399418 |
| H | 1.336483  | -4.737909 | -4.413299 |
| H | 0.044342  | -5.465826 | -5.374200 |
| H | 0.351078  | -3.729672 | -5.495667 |

SCF Done: E(RB3LYP) = -937.292695466 Hartrees      A.U. after 5 cycles  
Sum of electronic and zero-point Energies=            -936.958463 Hartrees  
Sum of electronic and thermal Energies=            -936.938353 Hartrees  
Sum of electronic and thermal Enthalpies=           -936.937409 Hartrees  
Sum of electronic and thermal Free Energies=        -937.008912 Hartrees

XYZ-coordinates for **3c-2H<sup>+</sup>**:

|   |           |           |           |
|---|-----------|-----------|-----------|
| C | 6.082057  | -0.548793 | 0.014105  |
| C | 5.281926  | -1.720885 | -0.050716 |
| C | 3.911709  | -1.632845 | -0.080634 |
| C | 3.304752  | -0.363701 | -0.044674 |
| C | 4.087524  | 0.818511  | 0.018723  |
| C | 5.492849  | 0.702043  | 0.047344  |
| N | 1.937837  | -0.235651 | -0.070969 |
| C | 1.274436  | 0.937692  | -0.033741 |
| C | 2.043409  | 2.122019  | 0.021420  |
| C | 3.412711  | 2.065495  | 0.047739  |
| C | -0.170925 | 1.002553  | -0.048039 |
| C | -1.016971 | -0.047898 | 0.005065  |
| C | -2.475368 | 0.008908  | -0.004653 |
| C | -3.186093 | -1.198805 | 0.107210  |
| C | -4.574228 | -1.222610 | 0.106757  |
| C | -5.259210 | -0.019946 | -0.008009 |
| C | -4.588984 | 1.193355  | -0.124766 |
| C | -3.202222 | 1.206223  | -0.122541 |
| N | -6.743264 | -0.008398 | -0.012769 |
| C | -7.327589 | -0.749357 | -1.193137 |
| C | -7.339351 | -0.482041 | 1.293250  |
| C | 7.507379  | -0.669586 | 0.046013  |
| N | 8.656822  | -0.773216 | 0.072051  |
| H | 5.761171  | -2.690596 | -0.076174 |
| H | 3.306218  | -2.529581 | -0.129425 |
| H | 6.099312  | 1.596795  | 0.095638  |
| H | 1.401761  | -1.094114 | -0.131171 |
| H | 1.524586  | 3.069732  | 0.047121  |
| H | 3.992105  | 2.979912  | 0.092647  |
| H | -0.555688 | 2.013635  | -0.089079 |
| H | -0.623862 | -1.058722 | 0.072133  |
| H | -2.643693 | -2.131878 | 0.197832  |
| H | -5.092703 | -2.168498 | 0.192645  |



## 6 Calculation of the reorganization energy

33

|   |           |           |           |
|---|-----------|-----------|-----------|
| H | -5.137820 | 2.122970  | -0.220464 |
| H | -2.694886 | 2.156834  | -0.217974 |
| H | -7.023386 | 0.969381  | -0.118462 |
| H | -8.404784 | -0.600682 | -1.182863 |
| H | -6.891242 | -0.344066 | -2.102306 |
| H | -7.090658 | -1.804818 | -1.092129 |
| H | -8.417001 | -0.345930 | 1.238842  |
| H | -6.917251 | 0.111782  | 2.099274  |
| H | -7.098814 | -1.533291 | 1.425415  |

SCF Done: E(RB3LYP) = -937.705878009 Hartrees      A.U. after 13 cycles

Sum of electronic and zero-point Energies=                    -937.355129 Hartrees

Sum of electronic and thermal Energies=                    -937.335570 Hartrees

Sum of electronic and thermal Enthalpies=                   -937.334626 Hartrees

Sum of electronic and thermal Free Energies=                -937.403993 Hartrees

### Computed UV/vis Spectrums of calculated Compounds by TD-DFT

The optimized structures **3** were used in TD-DFT calculations applying the hybrid exchange-correlation functional CAM-B3LYP.

First three computed transitions of the first excited state for **3a**:

- 1) 387 nm, oscillator strength: 1.5168, orbitals involved: HOMO-2 → LUMO, HOMO-1 → LUMO, HOMO → LUMO, HOMO → LUMO+1
- 2) 291 nm, oscillator strength: 0.0930, orbitals involved: HOMO-5 → LUMO, HOMO-2 → LUMO, HOMO-1 → LUMO+1, HOMO → LUMO+1, HOMO → LUMO+2
- 3) 281 nm, oscillator strength: 0.0020, orbitals involved: HOMO-4 → LUMO, HOMO-4 → LUMO+4

First three computed transitions of the first excited state for **3a-H<sup>+</sup>**:

- 1) 509 nm, oscillator strength: 1.7179, orbitals involved: HOMO-1 → LUMO, HOMO → LUMO
- 2) 304 nm, oscillator strength: 0.0122, orbitals involved: HOMO-2 → LUMO, HOMO-1 → LUMO, HOMO-1 → LUMO+1, HOMO → LUMO+1
- 3) 298 nm, oscillator strength: 0.1322, orbitals involved: HOMO-2 → LUMO, HOMO-2 → LUMO+1, HOMO-1 → LUMO, HOMO → LUMO+1

First three computed transitions of the first excited state for **3a-2H<sup>+</sup>**:

- 1) 372 nm, oscillator strength: 1.3871, orbitals involved: HOMO → LUMO
- 2) 320 nm, oscillator strength: 0.0436, orbitals involved: HOMO-1 → LUMO, HOMO-1 → LUMO+1
- 3) 267 nm, oscillator strength: 0.2934, orbitals involved: HOMO-3 → LUMO, HOMO-1 → LUMO+1, HOMO-1 → LUMO+2, HOMO-1 → LUMO+3, HOMO → LUMO+1

First three computed transitions of the first excited state for **3b**:

- 1) 402 nm, oscillator strength: 1.5644, orbitals involved: HOMO-1 → LUMO, HOMO → LUMO, HOMO → LUMO+1, HOMO → LUMO+2
- 2) 294 nm, oscillator strength: 0.0889, orbitals involved: HOMO-5 → LUMO, HOMO-2 → LUMO, HOMO-1 → LUMO, HOMO-1 → LUMO+1, HOMO → LUMO+1
- 3) 283 nm, oscillator strength: 0.0019, orbitals involved: HOMO-4 → LUMO, HOMO-4 → LUMO+4

First three computed transitions of the first excited state for **3b-H<sup>+</sup>**:

- 1) 525 nm, oscillator strength: 1.7880, orbitals involved: HOMO-1 → LUMO, HOMO → LUMO
- 2) 307 nm, oscillator strength: 0.0720, orbitals involved: HOMO-3 → LUMO, HOMO-1 → LUMO, HOMO-1 → LUMO+1, HOMO → LUMO+1
- 3) 287 nm, oscillator strength: 0.0222, orbitals involved: HOMO-3 → LUMO, HOMO-3 → LUMO+1, HOMO-1 → LUMO, HOMO → LUMO, HOMO → LUMO+1

First three computed transitions of the first excited state for **3b-2H<sup>+</sup>**:

- 1) 373 nm, oscillator strength: 1.4302, orbitals involved: HOMO → LUMO
- 2) 305 nm, oscillator strength: 0.0250, orbitals involved: HOMO-1 → LUMO, HOMO-1 → LUMO+1, HOMO → LUMO+1
- 3) 268 nm, oscillator strength: 0.0429, orbitals involved: HOMO-3 → LUMO+3, HOMO-2 → LUMO, HOMO-2 → LUMO+1, HOMO-2 → LUMO+2, HOMO → LUMO+3

First three computed transitions of the first excited state for **3c**:

- 1) 418 nm, oscillator strength: 1.6842, orbitals involved: HOMO-1 → LUMO, HOMO → LUMO, HOMO → LUMO+2
- 2) 298 nm, oscillator strength: 0.0696, orbitals involved: HOMO-5 → LUMO, HOMO-2 → LUMO, HOMO-1 → LUMO+1, HOMO → LUMO+1, HOMO → LUMO+2
- 3) 286 nm, oscillator strength: 0.0016, orbitals involved: HOMO-4 → LUMO, HOMO-4 → LUMO+4,

First three computed transitions of the first excited state for **3b-H<sup>+</sup>**:

- 1) 536 nm, oscillator strength: 1.8978, orbitals involved: HOMO-1 → LUMO, HOMO → LUMO
- 2) 310 nm, oscillator strength: 0.0788, orbitals involved: HOMO-3 → LUMO, HOMO-1 → LUMO, HOMO-1 → LUMO+1, HOMO → LUMO+1, HOMO → LUMO+2
- 3) 294 nm, oscillator strength: 0.0396, orbitals involved: HOMO-3 → LUMO, HOMO-3 → LUMO+1, HOMO-1 → LUMO, HOMO → LUMO+1

First three computed transitions of the first excited state for **3b-2H<sup>+</sup>**:

- 1) 382 nm, oscillator strength: 1.5331, orbitals involved: HOMO → LUMO
- 2) 309 nm, oscillator strength: 0.0416, orbitals involved: HOMO-1 → LUMO, HOMO-1 → LUMO+1
- 3) 271 nm, oscillator strength: 0.2015, orbitals involved: HOMO-3 → LUMO, HOMO-1 → LUMO+1, HOMO-1 → LUMO+2, HOMO → LUMO+1, HOMO → LUMO+2
